# Supplementary material for: Comparison of different treatment strategies in the management of endogenic caesarean scar pregnancy: a multicentre retrospective study
Source: BMC Pregnancy Childbirth. 2022 May 12;22:404. doi: 10.1186/s12884-022-04633-y (PMC9103451; doi:10.1186/s12884-022-04633-y)
Supplement: Supplementary file 1 — Additional file 1. [file 12884_2022_4633_MOESM1_ESM.xlsx]

## Sheet: Sheet1
Age (years)	Number of caesarean section	Years from last caesarean	Vaginal bleeding (yes 1;no 0)	Abdominal pain (yes 1;no 0)	Gestational age (days)	Gestation sac/mass diameter (cm)	Foetal heartbeat (present 1; absent 0)	endogenic type (yes 1;no 0)	Myometrial thickness of uterine scar (mm)	MTX pretreatment (yes 1;no 0)	group	surgery (Curettage 0; Hysteroscopy 1)	Surgery time (min)	Blood loss (ml)	Blood transfusion (yes 1;no 0)	HGB before surgery (g/L)	β-hCG before treatment (mIU/ml)	β-hCG after treatment (mIU/ml)	β-hCG difference (mIU/ml)	Rate of β-hCG decline (%)	Hospital time (days)	Hospitalization expenses (￥)	Success treatment (yes 1;no 0)	complications (yes 1;no 0)	Further treatment measures	Time for hCG to decrease to normal (within 2 weeks 1; 2-4 weeks 2; > 4 weeks 3)	Time to resume menstruation (within 1 month 1; 1-2 months 2 ; > 3 months 3)
23	1	1	0	0	61	1.9	1	1	3	0	3	1	25	15	0	116	17829				3	9061	1	0
23	1	2	1	1	47	2.8	0	1	1.1	0	2	0			0	130					5	5718	1	0			2
23	1	5	1	0	85	1.6	0	1	4	1	1	0	25	50	0	107	313.8				4		1	0
24	1	1	0	1	49	1.2	1	1	4	0	3	1	30	50	0	128	9470				3	8241	1	0
24	1	1	1	1	38		0	1	2	1	1	0			0	127	1525	124	1401	0.918689	5	13388	0	0	medical treatment	3	2
24	1	0.4	1	0	50	2.3	1	1		1	1	0	10	10	0		22616	1760	20856	0.922179	24	13655	1	0
25	2	1	1	0	81	2.8	0	1	4	0	3	1	20	50	0	129	2989				4	15066.9	1	0			2
25	2	2	0	1	54	1.9	1	1	2.4	0	3	1	15	20	0	138	23239	6252	16987	0.730969	3	12492.6	1	0
25	1	3.5	1	0	70	4.5	0	1	2.6	0	2	0	45	70	0	128	2694	607.6	2086.4	0.774462	4	11743.1	1	0
25	1	3	1	0	45	1.6	0	1		0	2	0			0	128	36760				3	3932	1	0			2
25	1	2	0	0	56	5.6	1	1		0	2	0	20	100	0	116					6	6207	1	0			1
25	1	1	0	0	35	2.1	0	1		1	1	1	35	50	0	138	16336				4	10450	1	0			1
25	1	4	1	0	49	3.2	0	1	1.5	1	1	0			0	133	26435	3672	22763	0.861093	8	15253	1	0			2
25	1	3	1	0	41	1.5	0	1	5	1	1	0	15		0	119	7947				5	11476	1	0
25	1	4	1	0	54	1.6	1	1	4.5	1	1	0			0	110	17783				5	10613	1	0			2
26	1	2	1	0	66	7.4	0	1	5.7	0	3	1	20	50	0	110	4135				4	9767.15	1	0
26	2	3	0	0	61	2	0	1	4.6	0	3	1	15	10	0	112	59917				4	11021.8	1	0
26	2	1.5	0	0	49	2.3	1	1	4	0	3	1	15	20	0	130	182405				6	10871.4	1	0
26	2	3	0	0	45	1.4	2	1		0	2	0		little	0						2	2812	1	0
26	1	6	1	0	37	2.7	0	1	10	0	2	0		little	0	137					3	4200	1	0			3
26	2	1	1	0	48	3.4	0	1	5	0	3	1	15	10	0	93	45.31	3.47	41.84	0.923416	14	13496	1	0
26	2	1	1	0	56	3.8	1	1		1	1	0		400	0	113	40570	1412	39158	0.965196	7	14234	1	0		2	2
26	1	3	1	1	45	3.9	1	1	4	1	1	1	15	10	0		2174	102.8	2071.2	0.952714	34	18920	1	0
27	1	7	1	0	72	1.7	0	1		0	3	1	15	5	0	123	179.9				5		1	0
27	1	5	1	0	50	2.86	0	1	3.8	0	3	1	40	5	0	97	2193				3	10409.8	1	0		1	1
27	2	2	0	0	38	1.8	1	1	4.5	0	3	1	25	20	0	126	28223	4449	23774	0.842363	6	11035.1	1	0			1
27	2	2	0	0	54	2.6	1	1	3.2	0	3	1	40	50	0	97	82431	18291	64140	0.778105	3	11484	1	0		2
27	2	1	1	0	58	2.4	0	1	3.6	0	3	1	20	20	0	131	39771	3350	36421	0.915768	4	11353.5	1	0		1	2
27	2	1	1	1	91	3.6	0	1	3	0	3	1	50	20	0	129	3144	436.51	2707.49	0.861161	7	30007.4	1	0
27	2	3	0	0	39	1.1	0	1	3	0	3	1	15	20	0	124	8979	5050	3929	0.437577	2	13824.9	1	0		1	2
27	2		0	0	55	2.4	1	1	3.6	0	3	1	20	50	0	126	62688	11972	50716	0.809022	4	12834.9	1	0			1
27	1	3	1	0	35	1.4	0	1	3	0	3	1	60	20	0	113					5	11325	1	0			1
27	1	7	0	0	54	1.8	0	1		0	2	0			0	99					3	4063	1	0			1
27	1	5	0	0	39	3.2	0	1	3.5	0	3	1	15	20	0	117	42282	8000	34282	0.810794	3	8506	1	0
27	1	3	1	0	54	3.2	1	1	5	0	3	1	25	10	0	139	1958				2	8999	1	0
27	1	4	1	0	43	1.7	1	1	5	0	3	1	15	20	0	118	42433				5	8450	1	0
27	2	3	0	0	60	3.9	1	1	3.5	0	3	1	20	10	0	121	55240				4	9137.71	1	0
27	2		0	0	43	2.3	0	1		1	1	0			0	122	17968				7	12358	1	0			1
27	2	2	1	1	46	1.2	0	1	4	1	1	0			0	113	15691				6	12327	1	0
27	1	1	1	0	53	1	0	1	5.6	1	1	1	10	5	0		2731	312.7	2418.3	0.8855	14	13770	1	0
28	1	6	1	0	67	1.8	0	1	15	0	3	1	20	5	0	126	34750				5		1	0
28	1	3	1	0	47	1.1	0	1	3.5	0	3	1	10	50	0	120	51662				4		1	0
28	1	6	1	0	42	2.5	1	1	4	0	3	1	25	20	0	151	55606	13493	42113	0.757346	4	10245.4	1	0
28	1	4	1	0	50	3.3	0	1		0	3	1	15	20	0	116		34.59			5	9882.46	1	0
28	1	6	1	0	90	7	0	1	7	0	3	1	15	10	0	127	2565				3	9825.96	1	0
28	1	2	1	0	62	4.1	0	1	5	0	3	1	25	10	0	113	3611				3	10469.8	1	0
28	3	2	0	0	58	3.7	1	1		0	3	1	15	20	0	117					4	10363.9	1	0
28	1	4	1	0	49	2.7	1	1	4	0	3	1	20	10	0	129	32548	4840	27708	0.851297	5	12134.6	1	0		2
28	1	3	0	1	69	3.4	0	1		0	3	1	20	5	0	111	15950	2245	13705	0.859248	4	11102.8	1	0
28	1	2	1	0	71	5.1	1	1	3.2	0	3	1	30	50	0	134	34365				4	11552.2	1	0
28	2	1	1	0	51	2.7	1	1	5	0	3	1	35	5	0	89	65321	21698	43623	0.667825	3	11012.8	1	0		1
28	2	2	1	0	47	2.2	1	1	3	0	3	1	55	200	0	116	70948	16234	54714	0.771185	9	16110.4	0	0	medical treatment	3	2
28	1	4	1	1	46	1.5	1	1	2.7	0	3	1	15	10	0	101	38526	5305	33221	0.862301	3	12011.8	1	0
28	1	4	0	0	57	4.3	0	1	3	0	3	1	25	20	0	125	76236	25089	51147	0.670904	3	11865	1	0		2	1
28	2	2	0	0	42	2	0	1		0	3	1	20	5	0	122	5069	2241	2828	0.557901	6	9495	1	0			1
28	1	5	1	0	68	5.1	1	1	4	0	2	0	10	5	0	147	1660				4	8530.46	1	0
28	2	0.7	1	1	57	3.6	1	1	3	0	2	0	10	20	1	116	41474	4783	36691	0.884675	4	8069.12	0	0	Drug	3	2
28	2	1	1	1	65	2.3	0	1	2.3	0	2	0	70	500	0	120					3	6261	1	0
28	2	4	0	0	77	2.6	0	1	3	0	2	0			0	128					2	4256	1	0
28	1	3	0	0	43	3.4	1	1		0	2	0		little	0	117					3	4046	1	0
28	1	6	1	0	68	3.2	0	1		1	1	0	25		0	111	10401				7	13337	1	0			2
28	2	4	0	0	78	4	1	1		1	1	0			0	129	26292	1849	24443	0.929674	7	11871	1	0			2
28	2	2	0	0	48	3.2	0	1		1	1	0			0	107	10131	2710	7421	0.732504	10	14022	0	0	observation and drug	3	2
29	2	2	1	0	49	2.5	0	1	5	0	3	1	20	10	0	122	36339	6740	29599	0.814524	4	10434.8	1	0
29	1	4	1	1	50	1.8	1	1	3	0	3	1	30	10	0	122	27166				4	10389.1	1	0		1	1
29	2	4	0	0	46	1.9	1	1	4.5	0	3	1	15	10	0	132	46596	13313	33283	0.714289	2	11236.4	1	0
29	1	5	0	1	48	1.9	0	1	4	0	3	1	20	10	0	137	46403	17562	28841	0.621533	3	12972.7	1	0		2	1
29	1	3	0	0	43	1.3	0	1	5	0	3	1	25	50	0	130		8256			7	12687.8	1	0		1	2
29	2	2	1	0	44	2.1	1	1	5	0	3	1	35	20	0	100	18508	5469	13039	0.704506	5	13793	1	0		1	1
29	1	8	1	1	58	5	0	1	1.8	0	3	1	35	30	0	124	47853				7	13005.2	0	0	medical treatment	3	2
29	2	6	1	1	45	2.2	0	1		0	3	1	30	30	0	105	20558				3	12533.8	1	0		1	1
29	1	4	1	0	35	2.9	0	1		0	3	1	19	10	0	123	1607				7	9602	1	0		1	1
29	1	2	1	1	74	3.6	0	1	5	0	2	0	15	10	0	123	3617				6	9370	1	0
29	1	5	0	0	47	4.3	0	1	3	0	2	0	25	10	0	116	45444				7	8705.25	1	0
29	1	1	1	0	45	1.5	0	1	6	0	2	0		50	0	127					2	3125	1	0			2
29	1	5	0	0	58	4.8	0	1	2	0	2	0		20	0	133	78790				2	3281	1	0		2	1
29	1	7	1	0	66	5	0	1		0	2	0	25	300	0	115	40530				2	4217	1	0			1
29	1	5	1	1	50	3	1	1	3	0	3	1	15	10	0	130	404.9	135.6	269.3	0.665102	7	11503	1	0
29	1	5	1	0	75	1.7	0	1	5	0	3	1	25	10	0	99	2836				3	8395	1	0
29	1	6	1	0	75	3	0	1	3.6	0	3	1	20	50	0	107	2470				3	7991	1	0
29	2	1	1	0	56	4	1	1	4	0	3	1	20	10	0	104	174398				2		1	0
29	1	5	1	1	45	4.6	0	1	5	1	1	0	13	10	0	107	157	3.07	153.93	0.980446	20	11208	1	0
29	2	3	0	0	68	1.1	1	1		1	1	0	12		0	131	16516				6	13373	1	0
29	2	0.5	0	0	67	1.7	0	1	4	1	1	0			0	123	15918				6	11388	1	0
29	1	7	1	0	65	2	0	1	2.6	1	1	0			0	113					6	13364	0	0	observation and drug	3	2
29	2	0.83	0	0	39	1.2	0	1	5	1	1	0	20	10	0		16817	2133	14684	0.873164	16	10956	1	0
29	1	6	1	0	37	1.6	0	1	2.9	1	1	1	15	20	0		1837	368.3	1468.7	0.79951	15	11942	1	0
30	1	5	1	1	51	3.4	1	1	3	0	3	1	25	10	0	113	48192	23305	24887	0.516414	3	10233	1	0
30	2	4	1	1	42	1.6	0	1	4.7	0	3	1	50	5	0	130	16915				4		1	0
30	1	5	0	0	59	2.6	0	1	3	0	3	1	25	20	0	135	39430	11246	28184	0.714786	3	11358	0	0	medical treatment	3	2
30	2	2.4	1	1	60	1.8	0	1	4	0	3	1	25	10	0	121	340.7				6	11302	1	0
30	1	2	0	0	42	1.7	0	1	5.5	0	3	1	25	20	0	134	21052				4	11392.3	1	0			2
30	1	6	1	1	44	1.5	0	1	4	0	3	1	15	10	0	111	6626				5	10462.3	1	0
30	1	6	0	0	51	2.9	1	1	4	0	3	1	25	10	0	133					4	11010.6	1	0
30	1	4	1	0	41	2	0	1	3.2	0	3	1	20	10	0	134	32704				3	12063.8	1	0
30	2	3	1	0	65	3.8	0	1	2.5	0	3	1	20	50	0	129	34514	7589	26925	0.780118	1	10183.4	1	0		2	2
30	1	7	0	0	45	2.3	1	1	3.1	0	3	1	15	40	0	123	34539	4837	29702	0.859955	4	12204.6	1	0
30	2	2	0	0	61	2	1	1	2.6	0	3	1	25	50	0	75		33467			9	14378.6	1	0
30	1	9	0	0	93	5.2	0	1	4	0	3	1	25	30	0	122		43.26			7	13433.3	1	0		1
30	2	2	0	1	34	1.7	0	1	2.6	0	3	1	35	20	0	133	12133	4109	8024	0.661337	2	12384.6	1	0			2
30	2	7	1	0	35	2	0	1	3	0	3	1	28	2	0	122	14262	409	13853	0.971322	2	9395	1	0		1	1
30	2	2	1	0	42	3	1	1		0	3	1	21	2	0		40542				2	7333	1	0			1
30	2	3	1	0	78	1.7	0	1	2.4	0	2	0	20	20	0	117	12817	718.6	12098.4	0.943934	2	8441.77	1	0
30	3		0	0	44	1.5	0	1		0	2	0			0	119					4	5334	1	0			1
30	2	3	0	0	60	2.2	0	1	3	0	2	0		10	0	142	40440				2	3272	1	0
30	3	3	0	0	62	4.7	1	1	3	0	2	0			0	127					3	3003	0	0	observation and drug	3	2
30	2	0.8	1	0		3.4	2	1	2.6	0	2	0		little	0						2	4427	0	0	Drug	3	1
30	1	2	1	1	53	3.8	1	1	5	0	3	1	20	30	0	130	107254	16762	90492	0.843717	4	10254	1	0
30	2	6	0	0	51	4	0	1	2	1	1	0			0	130	79000				5	12256	1	0			2
30	2	0.6	1	0	47		0	1	8	1	1	0			0	120	80310				4	13766	1	0
30	2	1	0	0	56		2	1		1	1	0			0	119	32037				4	11026	1	0
30	2	3	1	0	50	4.7	1	1	1	1	1	0			0	130	136820				5	15955	0	0	Drug	3	2
30	2	2	0	0	44	2.6	2	1		1	1	0			0	122					6	11677	1	0
30	2	0.5	0	0	50	2.1	2	1	0	1	1	0			0	110	19310	1803	17507	0.906629	8	14060	1	0		2	1
30	1	7	1	0	37	1	0	1		1	1	0			0	123	4973				8	13307	0	0	medical treatment	3	2
30	1	8	1	0	50	2.4	0	1	3.5	1	1	1	15	20	0		8743	779.5	7963.5	0.910843	25	19663	1	0
30	1	5	0	0		3	0	1	3	1	1	1	15	20	0		2998	48.01	2949.99	0.983986	23	15842	1	0
31	1	4	0	0	41	1.4	1	1	4	0	3	1	15	10	0	137	12336				2	9011	1	0
31	1	1	1	1	45	1.7	0	1		0	3	1	15	10	0	129	28435				4		1	0
31	1	6	1	1	50	4.3	0	1	5.5	0	3	1	30	10	0	133	71142				3		1	0
31	2	2	1	0	47	3.5	0	1	4	0	3	1	20	20	0	144	72595	10787	61808	0.851408	5	11035.1	1	0
31	2	2	1	1	45	2.3	0	1		0	3	1	25	30	0	124	944.2	167.4	776.8	0.822707	5	10892.3	1	0		1
31	2	3	1	0	47	1.6	0	1	6	0	3	1	40	20	0	144	12312				5	11060.5	1	0
31	1		1	0	60	3.3	0	1	3.7	0	3	1	15	50	0	86	22.77				2	10920.3	1	0
31	1	6	1	0	59	5.2	0	1	3	0	3	1	55	200	0	143	95651	8509	87142	0.911041	5	11939.3	1	0		2	1
31	2	1	0	0	51	2.6	0	1	3	0	3	1	10	10	0	129		13112			7	13749.4	1	0			2
31	1	6	1	1	60	3.1	0	1	4	0	3	1	50	50	0		284.7				3	12006.1	1	0		2	2
31	1	8	1	1	57	1.5	0	1	2.6	0	3	1	25	20	0	95	23062				4	14449.6	1	0		2	2
31	1	3	1	0	49	2.3	1	1	2.8	0	3	1	25	100	0	122	25506.5	17896	7610.5	0.298375	6	12040.5	1	0			2
31	1	5	1	1	73	2.2	0	1	3.3	0	3	1	35	50	0	149	941.04	180.5	760.54	0.808191	3	12130.6	1	0		2	2
31	2	4	0	0	41	2.5	0	1	5	0	3	1	20	20	0	117	35808				4	11213.3	1	0		1	1
31	1	10	1	0	40	1.2	0	1	3	0	3	1	30	10	0	135	11665	2792	8873	0.760652	5	12505.3	1	0
31	1	19	1	0	47	1.6	1	1	3	0	3	1	25	15	0	126	17478	3240	14238	0.814624	3	12190.6	1	0		1	1
31	1	2	1	1	56	1.8	0	1	1.5	0	3	1	40	5	0	133	11346	37.79	11308.2	0.996669	3	8092	1	0			1
31	1	8	0	0	56	2.1	1	1		0	3	1	30	10	0	128					2	8385	1	0			1
31	1	8	0	0	80	6.6	1	1	5	0	2	0	95	1200	1	139	78148	5916	72232	0.924297	10	15184	1	0
31	1	5	1	1	48	1.3	0	1	4	0	2	0			0	126					3	4120	1	0
31	1	5	0	0	57	2.1	0	1		0	2	0			0	101					4	4650	1	0			1
31	1	7	0	0	44	2.2	2	1		0	2	0		little	0						1	3036	1	0		2	2
31	2		0	0	42	1.4	1	1	3	0	2	0		little	0	142					2	4120	1	0
31	1	13	1	1	40	1.8	0	1	3.5	0	3	1	55	50	0	126	36128				5	9178.82	1	0
31	2	3	1	0	49	2.7	0	1		1	1	1	38	50	0	126	51904	26375	25529	0.49185	22	16856	0	0	observation and drug	3	1
31	1	1	0	0	56	2.6	1	1		1	1	0	16		0	116					11	12166	1	0
31	1	7	0	0	48	1.8	0	1	3.5	1	1	0	10	10	0		2001	494.2	1506.8	0.753023	15	11134	1	0
31	2	5	1	1	42	2.3	0	1	4.2	1	1	1	15	20	0		2748	108.8	2639.2	0.960408	44	25345	1	0
32	1	4	1	0	42	1.7	1	1	3.2	0	3	1	20	10	0	105	14124	3098	11026	0.780657	6	10414.4	1	0
32	1	8	1	0	59	3.8	2	1		0	3	1	10	20	0	113	2350				8	10516.3	1	0		1	1
32	1	0.5	0	0	75	5.5	1	1	3	0	3	1	60	50	0	122	57871	8034	49837	0.861174	10		1	0
32	1	4	1	1	46	1.3	0	1	4.5	0	3	1	20	20	0	121	10836	3292	7544	0.696198	4	10741.3	1	0
32	2	4	1	0	64	4.4	1	1	4.2	0	3	1	30	20	0	136	54970				8	12897	1	0
32	1	10	1	0	55	4.3	0	1	3	0	3	1	40	150	1	58	17465				6	14270.1	0	0	Drug	3	1
32	2	2	0	0	45	3.3	0	1	3	0	3	1	35	10	0	133	94830				4	12631.3	1	0
32	3	2	0	0	52	1.7	1	1	4	0	3	1	40	20	0	113	26312	5092	21220	0.806476	4	14630.4	1	0		2	2
32	2	4	1	1	54	1.6	0	1	5	0	3	1	20	20	0	117	1143				4	12486.1	1	0
32	2	3	1	0	48	3.1	1	1	3	0	3	1	25	10	0	121	37430				3	12348.3	1	0
32	2	0.7	0	0	60	2.9	1	1	5.3	0	2	0	30		0	94	96685				5	5631.31	1	0
32	2	2	1	0	65	4.5	0	1		0	2	0			0	108		807			2	3583	1	0			2
32	1	2	0	0	59	5.7	0	1	2	0	2	0		little	0	123					2	3614	0	0	Drug	3	2
32	1	5	0	0	71	5.2	1	1	4	0	3	1	25	80	0	130					11	8916	1	0
32	2	6	1	0	56	1.8	0	1	4	1	1	0			0	116	39230	3141	36089	0.919934	7	12441	1	0			1
32	2	0.5	1	0		2.2	0	1	2.6	1	1	0			0	113	31000	1127	29873	0.963645	10	6857	0	0	medical treatment	3	1
32	1	4	1	1	49	2.1	1	1		1	1	0			0	131		382.7			8	14834	1	0			1
32	2	6	0	0	57	3.3	0	1	2.5	1	1	0			0	110	15802				8	12236	1	0			2
32	2		0	0	58	2.5	1	1		1	1	0			0	139	69280				5	11597	1	0			1
32	2	2	1	0	68	2.6	1	1	3.3	1	1	0			0	142	11808	3655	8153	0.690464	9	4808	0	0	Drug	3	2
32	2	7	0	0	41	1.9	0	1		1	1	0	15	10	0	118	27797				5	11837	1	0
32	2	3	0	0	41	6.1	0	1	3	1	1	1	10	10	0		540.7	42.11	498.59	0.922119	21	14641	1	0
32	2		0	0			0	1		1	1	1			0						8	13396	1	0
33	1	6	1	1	80	2.9	0	1	4	0	3	1	20	10	0	66	390.38	114.7	275.68	0.706184	2	9681	1	0
33	1	12	1	0	40	2.4	1	1	3	0	3	1	20	10	0	136	27819				4	11998	1	0
33	2	9	1	0	89	1.2	0	1		0	3	1	25		0	100	4170				8	12008.4	1	0
33	2	3	0	0	45	1	0	1	4.5	0	3	1	20		0	113	12679				2	9797.92	1	0		1	1
33	1	8	0	0	40	2	0	1	5.5	0	3	1	20	10	0	120	14107	2659	11448	0.811512	7	11095.6	1	0
33	2	5	0	0	49	2.1	0	1	3.5	0	3	1	35	20	0	122	12379				3	10652.2	1	0		2
33	1	5	0	0	68	6.4	1	1	4	0	3	1	20	10	0		127128				4	10390	0	0	Drug treatment for 2 months	3
33	2	2	1	0	49	2.2	1	1	3	0	3	1	25	20	0	128	31466	4948	26518	0.842751	5	11604.7	0	0	Drug	3	2
33	1	3	0	0	39	1.6	0	1	6.6	0	3	1	120	50	0	98	48217	18659	29558	0.61302	2	14276.9	1	0		1	2
33	2	10	1	0	42	2.1	1	1	3.3	0	3	1	20	20	0	130	30937	9249	21688	0.701038	2	11228.1	1	0
33	2	1	0	0	57	1.4	1	1	4	0	3	1	20	20	0	113		39826			10	15737.9	1	0
33	2	3	0	0	40	1.8	1	1	3	0	3	1	25	50	0	119	93035				2	11660.1	1	0
33	1	7	0	0	49	1.5	1	1		0	3	1	95	100	0	118					10	19993.3	1	0			2
33	2	4	0	0	35	1.3	0	1		0	3	1	25	10	0		12726				3	9450	1	0
33	1	8	1	1	79	3.7	0	1	5	0	2	0			0	156	10041				2	3084.11	1	0
33	1	3	1	1	60	3.9	1	1		0	2	0			0	109	30596	9713	20883	0.68254	2	3285.18	1	0
33	1	7	1	0	58	3.7	1	1	3	0	2	0	25	10	0	115	130857	41755	89102	0.680911	4	13073.8	1	0		1	1
33	2	5	1	0	70	4.1	0	1	2.6	0	2	0	20	30	0	122	6881	1296.96	5584.04	0.811516	2	3489.76	1	0		2	2
33	2	1	0	0		4.1	0	1		0	2	0			0	141	44290				8	14271	1	0			2
33	2	2	0	0	49	4.1	0	1	2	0	2	0		20	0	127	109210				3	3347	1	0
33	1	2	1	0	49	1	0	1	3.6	0	2	0			0	147	53800				2	3577	1	0		2	1
33	2	2	1	0	65	4.5	1	1	4.3	1	1	0			0	121	37477	14997	22480	0.599835	6	5209.77	1	0
33	2	2	1	1	79	4.6	0	1		1	1	0			0	111	17900	282.8	17617.2	0.984201	7	14341	1	0		2	1
33	1	4	0	0	67	2.5	1	1		1	1	0	40	300	0	127					8	13729	1	0
33	1	4	1	1	47	2.9	0	1	3.5	1	1	0	30	50	0		2457	801.4	1655.6	0.67383	38	13700	1	0
34	2	3	1	0	59	3.6	0	1	4	0	3	1	15	20	0	121	13476				3	8829	1	0
34	1	7	1	0	48	1.6	1	1	3	0	3	1	20	10	0	123	25830				10	11841	1	0
34	1	7	1	0	38	1.3	1	1	4	0	3	1	25	30	0	135	15698				6	11930.6	1	0
34	1	10	1	0	71	2.8	0	1	3.1	0	3	1	25		0	120	23407				4	10455	1	0		2	2
34	2	1	1	0	40	1.8	0	1	4.3	0	3	1	15	20	0	132	3115				1	9776.45	1	0
34	2	2	0	0	44	2.6	2	1	3	0	3	1	20	20	0	123	52373	9556	42817	0.81754	3	10830.2	1	0		1	1
34	2	3	0	0	50	3	1	1	5	0	3	1	35	20	0	121	45611	7938	37673	0.825963	4	12756.3	1	0
34	3	3	0	0	42	2	0	1	5	0	3	1	30	20	0	126	23776	2908	20868	0.877692	4	11913.9	1	0		2	2
34	2	3	1	0	65	4.7	1	1	6	0	3	1	60	300	0	132	184577	9709	174868	0.947399	6	13951.5	1	0		1	1
34	2	4	1	0	46	2.35	0	1	7	0	3	1	25	20	0	127	2635	437.4	2197.6	0.834004	5	12438.7	1	0		1	1
34	1	6	0	1	58	3.7	1	1	4.7	0	3	1	10	10	0	122	13902				4	13401.9	1	0			2
34	1		0	0	85	8.5	0	1	4	0	3	1	20	20	0	134					5	11187.2	1	0		1	2
34	3	5	1	1	40	1.2	0	1	2.6	0	3	1	20	10	0	116	27818	14969	12849	0.461895	4	12269.2	1	0		1
34	1	11	1	0	38	1.7	1	1	2.6	0	3	1	80	80	0	97	42059				5	23106.7	1	0		1
34	1	10	0	0	42	1.7	1	1	8.5	0	3	1	20	20	0	121	9504				4	12103.5	1	0
34	2	3	0	0	40	2	1	1	2.7	0	3	1	20	30	0	122	64021	35313	28708	0.448415	8	12847.8	1	0
34	2	1	1	1	35	1.6	0	1	4.5	0	3	1	20	10	0	117	11394	7240	4154	0.364578	3	11572.3	1	0		1	2
34	2	2	0	0	35	1.2	0	1		0	3	1	12	10	0	132	8755				2	8628.93	1	0			1
34	1	5	0	0	42	2.3	1	1		0	3	1	10	5	0	124	50021	10936	39085	0.781372	5	7934	1	0
34	2	2	1	1	64	4	0	1		0	3	1	15	15	0	117	12896				6	11705	1	0			1
34	1	11	0	0	49	1.5	1	1	5	0	2	0	15	10	0	139					2	7268.62	1	0
34	1	11	1	0	45	2.8	1	1		0	2	0	35	50	1	81	22543	2903	19640	0.871224	2	13192.4	1	0			1
34	2	3	1	1	46	1.5	1	1	4	0	2	0	40	20	0	125	14117	4611	9506	0.673373	2	11037.2	1	0
34	1	9	1	0	44	2.2	0	1		0	2	0		little	0	128	23100				2	2975	1	0
34	2	2	0	0	44	1.7	0	1	6	0	2	0		little	0	129	47310				2	3642	0	0	medical treatment	3	2
34	1	6	1	0	44	2	1	1	3	0	3	1	55	20	0	130	15381	2370	13011	0.845914	5	8708.43	1	0
34	2	6	1	0	43	1	0	1	6	1	1	0	25	10	0	148	15679				7	13099	0	0	observation and drug	3	1
34	2	7	1	0	50	3	2	1		1	1	0			0	137	41220				6	10960	1	0
34	1	3	0	0	79	5.4	1	1		1	1	0		100	0	125	117130	313	116817	0.997328	9	16729	1	0
35	2	3	1	1	50	2.6	1	1	5	0	3	1	20	10	0	115	44312				3	9016.5	1	0
35	2		1	1	39	2.2	0	1	3.9	0	3	1	40	50	0	118	25876				4	11938.7	1	0
35	2	3	1	0	94	1.4	1	1	5	0	3	1	10	50	0	133	25315	8261	17054	0.673672	5	12697.4	1	0		1	1
35	1		1	0	40	1.8	0	1	2	0	3	1	15	10	0	136	32825	6988	25837	0.787113	2	11353	0	0	medical treatment	3	1
35	1	11	1	0	54	3.6	1	1	3	0	3	1	15	30	0	119	>200000	69993			4	12540.5	1	0		2	1
35	2	9	0	1	54	2.4	1	1	3	0	3	1	30	50	0	142	64534				6	15885.9	1	0		1	2
35	1	7	1	1	56	3.55	0	1	3	0	3	1	21	50	0	124	933.7	356.8	576.9	0.617864	3	12361.6	1	0		1	1
35	2	6	0	0	53	2.8	1	1	2.8	0	3	1	30	10	0	106	33654				3	12158.2	1	0		2	1
35	2	3	0	1	38	1.7	0	1	3	0	3	1	20	10	0	114	4712	348.22	4363.78	0.926099	5	12670.6	1	0		2	1
35	2	3	0	0	40	1.8	1	1	3	0	3	1	25	50	0	119	93035				4	13673.3	1	0
35	1	6	0	0	42	2	0	1		0	3	1	35	5	0	98	6952	2527	4425	0.636507	6	11072	1	0			1
35	1	9	1	0	52	1.8	0	1	6.9	0	2	0	15	20	0	110	45678				2	10620	1	0
35	2	10	1	1	39	2.3	0	1		0	2	0			0	123					2	3127	1	0			1
35	1	11	1	0	35	1.2	0	1	6	0	2	0			0	126					3	3655	1	0			2
35	1	9	1	0	42	1.41	0	1	3.7	0	3	1	15	30	0	133	12112	3284	8828	0.728864	1	8080	1	0
35	2	1	0	0	54	3.2	1	1	1	1	1	1	30	20	0	125	109079				6	11801.1	1	0
35	1	16	1	1	58	2.5	0	1		1	1	0		50	0	102	19750	3425	16325	0.826582	9	4719	1	0			1
35	1	9	0	0	50		2	1		1	1	0	10		0	115					5	14065	1	0			2
35	3		0	0	45	3.5	1	1	2.5	1	1	0	20		0	121					3	12291	1	0		2	2
35	2	9	0	0	72	5.2	1	1	2.5	1	1	0	30	50	0		51915	3126	48789	0.939786	15	9940	1	0
35	3	2	0	0		1.5	0	1	3	1	1	1	20	15	0		50863	4769	46094	0.906238	15	15410	1	0
36	2	9	0	0	64	2.4	1	1	4.6	0	3	1	15	10	0	119	54050				6		1	0
36	1	10	0	0	45	2.3	1	1	4.5	0	3	1	20	30	0	120	1459				2	9737.2	1	0
36	1	7	1	0	68	2.8	0	1		0	3	1	15	10	0	115	27476				4	9412.37	1	0
36	1	9	1	0	37	1.3	0	1	6	0	3	1	15	20	0	126	27565	4210	23355	0.84727	5	11035.1	1	0
36	2	3	0	0	50	1.1	0	1	5.8	0	3	1	20	20	0	128	5572	1110	4462	0.80079	4	10751.3	1	0
36	1	5	1	1	54	3.2	0	1		0	3	1	15	5	0	117	4659	694	3965	0.851041	3	11301.2	1	0			1
36	1	5	1	0	58	4.6	0	1	3.5	0	3	1	25	50	0	119	64495	14868	49627	0.769471	4	11508.4	1	0		1	1
36	2	0.5	0	0	48	2.6	1	1	8	0	3	1	25	20	0	125	2630	317.63	2312.37	0.879228	3	11697.9	1	0			1
36	2	2	1	0	28	2.5	1	1	3	0	3	1	20	20	1	77	86398	24984	61414	0.710827	5	15505.8	1	0		1	1
36	2	5	1	0	46	1.6	1	1	3	0	3	1	10	10	0	102	21037	1749	19288	0.916861	2	12395.1	1	0		2	1
36	1	13	1	0	40	1.2	1	1	3	0	3	1	20	20	0	87	13316	5756	7560	0.567738	2	11862.2	1	0			1
36	1	9	0	0	50	2.86	1	1	3	0	3	1	25	10	0	113	60183				4	12305.9	1	0		1	1
36	1	2	0	0	84	6.5	1	1	4.5	0	3	1	60	20	0	85	65532				6	12796.3	1	0		1	2
36	1	1	1	0	48	3.2	0	1	4.6	0	3	1	30	30	0	121	14868	2146	12722	0.855663	4	13952.1	1	0			2
36	1	7	1	0	59	2.1	0	1	3	0	3	1	30	50	0	133		8012			4	13253.6	1	0
36	2	6	0	0	54	5.5	0	1	3.2	0	3	1	35	10	0	126		31040			4	13107.9	1	0		2	1
36	3	4	1	0	49	2.4	1	1	3	0	3	1	14	5	0	95	43885	7327	36558	0.833041	5	10388	1	0			1
36	1	5	0	1	45	2	0	1	8	0	2	0	10	10	0	123	72256				2		1	0
36	1	1	1	0	63	1.3	1	1	3.8	0	2	0	20	5	0	137	18856	1125	17731	0.940337	3	8708.43	1	0
36	1	3	0	0	45	3.6	1	1	7	0	2	0	10	20	0	119	70025				3	6164.7	1	0		1	1
36	2	6	0	0	64	5.3	1	1		0	2	0	20	20	0	134					1	3568	1	0		1	1
36	1	4	0	0	49	1.6	0	1	3.5	0	3	1	30	10	0	123	22277	4551	17726	0.795709	5	11691.8	1	0		1	1
36	1	5	1	0	50	2.7	0	1	3	1	1	1	25	10	0	128	12075				4	10683.2	1	0			1
36	2	8	1	0	46	1.3	0	1		1	1	0			0	117	4421	326	4095	0.926261	11	13506	1	0			2
36	2	3	1	1	48	1.7	0	1	3.7	1	1	0			0	131	14396				3	13069	1	0
36	1	9	1	0	49	1.1	0	1		1	1	0	10		0	131	3984				4	13329	1	0
36	1	14	1	0	47	2.3	1	1		1	1	0			0	121	58260	8670	49590	0.851184	8	13865	1	0			2
36	2	2	1	0	47	2.3	2	1	4	1	1	0		100	0	121					5	13364	1	0		2	1
36	2	7	1	0	49	1.4	0	1	2.4	1	1	0	10	10	0		3333	173.2	3159.8	0.948035	16	9288	1	0
36	1	3	0	1	41	1	0	1	6	1	1	0	10	50	0		16738	2072	14666	0.87621	9	8702	1	0
37	2	6	1	0	47	1.4	1	1	5.8	0	3	1	20	20	0	97	15944				4	10758.6	1	0		1
37	2	3	1	0	51	2	1	1	5	0	3	1	40	10	0	108	26879	8408	18471	0.687191	5	12011.6	1	0			1
37	1	13	0	0	44	2.8	1	1	4	0	3	1	35	5	0	145	83567				3	11823.4	1	0		1	2
37	1	8	1	0	56	3.5	0	1	2	0	3	1	110	70	0	110		8802			5	22767	1	0		2	1
37	1	14	1	0	55	2.4	0	1	5	0	3	1	25	20	0	117	66717				2	12008.6	1	0		2	1
37	1	2	1	0	57	3.6	0	1	2.3	0	3	1	80	80	0	134					3	20297.7	1	0		1	1
37	2	1	0	0	50	1.3	0	1	3.6	0	3	1	25	10	0	119	6107	1009	5098	0.83478	6	12933.2	1	0
37	2	4	0	0	49	1.5	0	1	2.5	0	2	0			0	75	9745				3	4159	0	0	observationand drug	3	1
37	2	9	1	0	48	2.4	1	1	2.4	0	2	0		little	0	124					3	3169	1	0
37	2	4	1	0	53	2.7	1	1	4	0	3	1	20	20	0	99	40033	5621	34412	0.859591	4	9109	1	0
37	2	9	0	0	49		2	1		1	1	0			0	131	5296				5	12509	1	0			2
37	1	11	1	0	63	4.4	0	1		1	1	0	23		0	114	64840				6	12444	1	0			1
37	1	12	1	1	34	1.1	0	1		1	1	0			0	129	7488				7	13147	1	0			2
37	2	4	0	0	55	5	0	1		1	1	0			0	114					5	14000	1	0
38	2	5	1	1	53	1.4	0	1	6	0	3	1	20	20	0	84	1869				3	10760.8	1	0		1	1
38	2	1	1	0	76	2.3	0	1	4	0	3	1	20	20	0	96	105.48				2	10047.7	1	0		2	2
38	2	2	1	0	43	2.4	0	1	5	0	3	1	35	50	0	111	57122				10	12812.2	1	0		2	2
38	1	14	0	1	41	2.1	1	1	3	0	3	1	30	10	0	136	24679	7795	16884	0.684144	4	11131.4	1	0			1
38	3	0.5	1	0	44	1.8	0	1	4.5	0	3	1	45	20	0	146	16711	5010	11701	0.700197	3	9698.92	1	0			3
38	1	13	1	1	70	2.6	0	1	5	0	3	1	30	20	0	108	24308	6752	17556	0.722231	4	12609.1	1	0
38	2	3	0	1	51	1.5	0	1	3	0	3	1	55	50	0	132	14840	3126	11714	0.789353	5	11580	1	0			1
38	1	6	0	0	48	2.6	1	1	4.1	0	3	1	25	30	0	109	62191				2	12334.9	1	0
38	2	5	1	0	47	2.5	0	1	2.8	0	3	1	30	20	0	133	91184	12051	79133	0.867839	4	12758.8	1	0		2	1
38	1	4	1	0	50	4.6	1	1	4	0	2	0			0	83					2	3493	1	0			1
38	2	3	1	0	49	2	1	1	3.5	0	3	1	10	10	0	124	62450	20999	41451	0.663747	2	9669	1	0
38	2	8	1	0	42	3.9	0	1		1	1	1	25	10	0	117	23341	1966	21375	0.915771	15	12421	1	0		2	1
38	3	3	1	1	42	2.7	1	1	1.3	1	1	1	40	20	0	117	83923				10	11504	1	0			1
38	2	9	0	0	56	5.4	0	1	3	1	1	0			0	112	70400	770.6	69629.4	0.989054	6	13989	0	0	medical treatment	3	1
38	2	9	1	0	56	2.4	1	1		1	1	0			0	121	52084				7	11706	1	0			1
38	1	12	0	0	42	1.2	2	1		1	1	0			0		16830				4	13206	1	0		2	2
38	1	2	0	1	55	3.1	0	1	5	1	1	0	60	80	0		1102	285.2	816.8	0.741198	38	20357	1	0
38	1	12	1	0	56	2.6	0	1	2.3	1	1	1	50	50	0		897.6	94.06	803.54	0.895209	42	18246	1	0
39	1	13	1	1	41	1.5	0	1	3.5	0	3	1	40	20	0	95	55957	5124	50833	0.90843	7	12362.3	0	0	Hysteroscopic surgery again	3	3
39	1	8	0	0	54	3.2	1	1	3	0	3	1	35	20	0	133					5	11532.2	1	0
39	2	2	1	0	40	2.9	0	1	3	0	3	1	15	10	0	118	24092	3438	20654	0.857297	3	11819.7	1	0		2	2
39	2	10	1	1	59	1.6	1	1	4	0	3	1	25	10	0	120	4342				4	11657.2	1	0		2	2
39	2	7	0	1	53	2.8	0	1	3	0	3	1	40	50	1	75	113413				4	15497.6	1	0
39	2	7	0	0	43	1.3	1	1	2.5	0	3	1	25	10	0	137	27582	12398	15184	0.550504	7	14486.4	1	0		2	1
39	1	2	0	0	42	2	1	1	4	0	3	1	15	5	0						2	6412	1	0			1
39	2	3	1	1	56	1.2	0	1	3	0	2	0	30	5	0	140	2987				3	8411.19	1	0
39	1	13	0	0	38	1.8	0	1	7.5	0	2	0			0	137	17388				2	3015	1	0			2
39	1	13	1	0	50	1.6	0	1	3.1	0	3	1	10	10	0	140	976.7	247	729.7	0.747108	8	11269	1	0
39	1	4	0	0	69	4.9	0	1	4	0	3	1	25	10	0	124	39379	8862	30517	0.774956	3	10489	1	0
39	1	16	0	1	42	2.8	1	1		1	1	1	39	20	0	125	38974	5134	33840	0.868271	6	6553	1	0		1	1
39	1	12	0	0	45		2	1		1	1	0			0	136	74150				8	13492	1	0
39	1	13	1	0	60	4.1	0	1	4	1	1	0			0	123					6	12617	0	0	Drug	3	1
39	1	11	1	0	52	5.1	0	1		1	1	0			0	134	122080	8084	113996	0.933781	6	13317	1	0			2
40	1	17	0	0	46	1.8	0	1	5	0	3	1	35	20	0	117	19505				6	14597.1	1	0
40	2	6	0	0	51	1.1	1	1	3.9	0	3	1	45	50	0	117	5968				5	12398.2	1	0		2	2
40	1	16	1	0	62	4.2	0	1	8	0	3	1	15	50	0	132	2275				6	13327.5	1	0
40	1	11	1	1	30	1.4	0	1		0	3	1	25	50	0	122	55182	17479	37703	0.683248	8	12941.4	1	0
40	1	15	0	0	40	1.5	0	1	4	0	3	1	25	20	0	111	13714	4953	8761	0.638836	4	12270.3	1	0
40	3	4	1	1	60	1.6	0	1	5.5	0	3	1	20	10	0	127	2422	603.4	1818.6	0.750867	2	12869.1	1	0
40	1	13	0	0	64	5.9	0	1	5	0	2	0	10	20	0	124	87778				10	8941.31	1	0
40	1	14	0	0	88	6.2	0	1	2.7	0	2	0		100	0	107	3264				1	3193.89	1	0
40	1	11	1	0	63	4.2	0	1	5	0	3	1	10	10	0	97	23.08	2.82	20.26	0.877816	12	11576	1	0
40	1	2	0	0	42	2	0	1	4.5	0	3	1	20	10	0	130	4720	2115	2605	0.551907	2	8568	1	0
40	1	3	1	0	46	2.3	2	1	4	1	1	1	10	10	0	112	18789	2720	16069	0.855234	3	9431.28	1	0		2	2
40	2	2	1	0	40	1.9	0	1	4	1	1	0		10	0	134	10955				6	12493	1	0
40	1	7	1	0	59	4.8	0	1	8	1	1	0		300	0			7244			8	15980	1	0
40	2	11	1	1	51	2	0	1	5	1	1	0			0	120	979				5	12116	1	0			1
40	2		1	1	51	1.7	0	1		1	1	0			0	130	48120	1513	46607	0.968558	8	4696	1	0			2
40	1	6	1	1	52		2	1		1	1	0	15	20	0	125	18190	172	18018	0.990544	7	14199	1	0
40	1	12	1	0	37	1.8	0	1	2.5	1	1	1	60	400	0		2603	156.3	2446.7	0.939954	53	25291	1	0
40	1	9	0	0	50	2.1	0	1	4	1	1	1	35	20	0		1977	456.5	1520.5	0.769095	21	14796	1	0
40	1	16	0	0		1.7	0	1	4.6	1	1	1	15	20	0		5756				18	11549	1	0
41	1	16	1	1	45	2.3	0	1	4	0	3	1	15	15	0	119	4239				7	11628.1	1	0			1
41	2	11	0	0	65	4.5	1	1	3.5	0	3	1	10	50	0	104	66189				4	12763.5	1	0		1	1
41	2	6	0	1	39	1.7	0	1	3	0	3	1	15	20	0	127	3362				4	12361.6	1	0		1	1
41	1	4	1	0	38	1.3	0	1	3	0	3	1	20	10	0	130	8402	2236	6166	0.733873	3	11886	1	0		2	2
41	2	5	0	0	49	1.3	0	1		0	3	1	35	10	0	106	5367				5	8688	1	0			2
41	1		1	0	46	1.4	1	1	3	0	2	0	25	20	0	111					2	1059.01	1	0
41	1	12	1	1	59	1.2	0	1	8	0	2	0	10	10	0	124	310.1	79.81	230.29	0.742631	7	8208.75	1	0
41	1	6	1	1	71	3	0	1		0	2	0			0	129	4970				2	3156	1	0			2
41	3	1	0	0	44	2.2	2	1		0	2	0	10	30	0						2	2623	0	0	Drug	3	2
41	1	14	1	1	36	2.1	0	1	2	1	1	0			0	102	7303	366.6	6936.4	0.949801	10	16911	0	0	observation and drug	3	3
41	1	18	1	0	70	2.8	0	1	1.8	1	1	0			0	104		954.8			7	13780	1	0
41	1	15	1	0	57		2	1		1	1	0	30		0						7	12641	1	0
41	1	11	0	0	51	2.8	1	1	4	1	1	0	30	50	0		1058	223	835	0.789225	52		1	0
42	1	10	1	0	48	1.3	0	1		0	3	1	45	5	0	124	6911				4	9785.61	1	0
42	1	6	0	0	59	4.1	0	1	4	0	3	1	20	20	0	136	42363	8020	34343	0.810684	4	12797.7	1	0
42	1	13	0	0	66	4.7	0	1	4	0	3	1	50	50	1	95	241640	5810	235830	0.975956	4	14945.6	1	0
42	1	7	0	0	45	1.3	1	1	3	0	3	1	15	20	0	128	8310				4	10948.9	1	0
42	1	15	0	0	42	1	0	1	5.6	0	3	1	60	50	0	117	8139				6	14184.3	1	0		1	2
42	2	2	1	0	50	1.2	0	1	2.6	0	3	1	15	20	0	136	15658	6116	9542	0.609401	4	13466.3	1	0			2
42	2	4	1	1		4.5	0	1	1	0	3	1	60	10	0	106	1386	184.8	1201.2	0.866667	6	10823	1	0		2	2
42	1	14	1	0		1.6	0	1	9	0	2	0		little	0	122					3	3244	1	0
42	1	3	0	0	42	1.2	0	1	4	1	1	1	15	20	0		9962	1710	8252	0.828348	16	14940	1	0
43	1	14	1	1	40	2.8	0	1	3.4	0	3	1	15	10	0	116	83327				4	11576.6	1	0
43	1		1	0	49	1.2	0	1	6	0	3	1	15	10	0	125	12147	4496	7651	0.629867	4	11004.1	1	0		2
43	1	15	0	0	46	2.2	0	1	3	0	3	1	40	50	0	137	852.6	83.94	768.66	0.901548	5	13076.8	1	0
43	2	10	1	0	38	1.7	0	1	3.6	0	3	1	15	20	0	133	13293				3	11755.1	1	0		1	2
43	2	9	0	0	47	2	1	1	2.5	0	3	1	40		0	113	52368	12102	40266	0.768905	6	15219	1	0			2
43	1	16	0	0	63	3.5	0	1	5	0	3	1	25	50	0	132	79285	21452	57833	0.729432	3	8139	1	0
44	1	15	1	0	64	4.8	1	1	3	0	3	1	60	200	0	125	121884	14352	107532	0.882249	4	25555.9	1	0		1
44	1	4	0	0	49	2.1	0	1		0	2	0	11	20	0	128	5276				2	4083	1	0		1	1
44	2	12	1	0	53	1	0	1	3.8	0	3	1	20	5	0	124	630	238	392	0.622222	6	8822.48	1	0
45	1	16	1	0	41	1.2	0	1	5	0	3	1	20	20	0	119	6756	5239	1517	0.224541	7	9864	1	0
46	1	14	1	1	60	6.2	0	1	3.7	0	3	1	20	20	0	117	1.7				3	11185	1	0
46	1	14	0	0	60	3.9	1	1	4	0	3	1	25	10	0						3	12962.2	1	0		1	2
46	2	6	0	0	63	5.5	0	1	5	1	1	0			0	101					7	12820	1	0			2
	1	7	1	0	91	3.2	0	1	3.3	0	3	1	30	10	0	113	7181.62	1963.02	5218.6	0.726661	3	8524.13	0	0	observation and drug	3	2
	2	7	1	0	42	2.3	0	1	3.1	0	3	1	45	50	0	133	13655.9	13.81	13642.1	0.998989	3	7548.53	1	0
	1	11	1	1	63	1.9	0	1	3.8	0	3	1	20	30	0	128	2601.48				3	6413.31	1	0
	1	6	1	0	49	3.1	1	1		0	2	0	15	200	0	106	148626				6	27040.3	1	0
	2	4	0	0	42	1.2	0	1		0	2	0	10	10	0	132	20502.5				6	19810.6	1	0		2
	2	4	1	1	49	2.7	1	1	3.7	0	2	0	20	100	0	126	28636.5				3	8542.4	0	0	observation and drug	3	2
	2	6	1	1	49	2.6	1	1		0	2	0	25	50	0	123	2264.3				2	7037.22	1	0
	2	2	1	0	56	2.9	1	1	5.4	0	2	0	15	20	0	121	132154	7310.74	124844	0.94468	6	5633.13	0	0	medical treatment	3
	2	5	0	0	42	1.9	1	1	5	0	2	0	35	20	0	83	38404.3	13091.2	25313.1	0.659122	4	5518.71	1	0			1
	1	7	1	1	42	2.1	0	1	3.3	0	2	0	40	20	0	140	14849.5	2270.55	12579	0.847096	3	5400.05	1	0
	1	9	1	1	56	2.26	0	1	4.2	0	2	0	50	10	0	136	9451.97				2	5144.72	1	0
	2	1	0	0	49	2.1	1	1	3.7	0	2	0	30	10	0	121	43196				2	4981.09	1	0			1
	1	11	0	0	49	4	0	1	3.7	0	2	0	30	20	0	98	30656.2				5	4921.86	1	0		2	1
	1	14	0	1	56	2.8	1	1	5.8	0	2	0	35	20	0	132	23384.4				3	4600.71	1	0			1
	3	2	0	0	35	4.3	1	1	3.2	0	2	0	35	10	0	108	60586.3	12563.4	48022.9	0.792636	5	4504.83	1	0		2	1
	2	4	0	0	42	1.7	0	1	3.2	0	2	0	20	5	0	107	19309.1				2	4463.26	1	0		2	1
	1	4	0	0	91	5.65	0	1	4.6	0	2	0	15	50	0	119	5311.06	19.95	5291.11	0.996244	6	4461.48	1	0
	2	2	1	0	49	1.2	0	1	3	0	2	0	30	20	0	127	11054	1354.67	9699.29	0.877449	6	4423.36	1	0			1
	1	6	0	0	49	3.2	0	1		0	2	0	20	10	0	138	43435.9				2	4383.14	1	0			2
	1	9	1	0	56	3.55	0	1		0	2	0	10	10	0	147					3	4382.37	0	0	Drug	3	1
	2	4	0	0	56	4.16	1	1	3.8	0	2	0	30	20	0	124	167865				3	4381.42	0	0	medical treatment	3	1
	2	3	1	0	63	4.8	1	1	3.5	0	2	0	20	20	0	133	87128.3	9506.2	77622.1	0.890894	3	4005.7	0	0	medical treatment	3	1
	1	5	0	0	49	1.09	0	1	5.3	0	2	0	20	50	0	120	2295				5	3981.5	1	0
	1	3	0	0	63	4.2	0	1	6	0	2	0	30	20	0	119					4	3961.22	0	0	medical treatment	3	2
	2	5	0	0	42	4.1	1	1	4.5	0	2	0	25	20	0	136	143789				4	3956.48	1	0			2
	1	9	0	0	56	1.24	0	1	5	0	2	0	40	20	0	143	23741.8				4	3934.23	1	0
	2	4	0	0	49	1.6	2	1		0	2	0	36	20	0	119	8012.75				2	3904.24	0	0	medical treatment	3	3
	2	1	1	0	42	2.1	0	1	4.5	0	2	0	15	20	0	150	30634.2	4844.24	25790	0.841868	3	3871.12	0	0	medical treatment	3	3
	2	3	0	1	56	2.9	1	1	3.4	0	2	0	35	20	0	132					2	3832.88	1	0
	1	14	1	1	70	4	0	1	4.8	0	2	0	10	30	0	129	13642.1				2	3790.65	1	0			2
	1	8	0	0	42	2.1	0	1	3.5	0	2	0	25	10	0	126	25033.8				2	3691.71	1	0		2
	2	4	1	1	42	3.5	0	1	4.1	0	2	0	10	20	0	119	39485.8				4	3690.47	1	0		2	2
	1	13	1	1	42	4.3	1	1	4.9	0	2	0	20	10	0	121	124577	13785.5	110792	0.889342	3	3670.55	0	0	medical treatment	3	2
	2	1	1	0	28	2.4	1	1	3.2	0	2	0	20	20	0		33512018				4	3636.24	1	0			2
	1	4	1	1	42	2.2	1	1		0	2	0	30	10	0	104	33903.6				3	3600.7	1	0
	2	3	0	0	42	1.2	0	1	3.5	0	2	0	15	5	0	125	14220				3	3578.77	1	0			2
	1	6	1	1	49	2.6	0	1	3.5	0	2	0	10	20	0	116	21015	11985.2	9029.78	0.429683	2	3569.25	1	0			2
	2	2	1	1	42	2.4	1	1	4.4	0	2	0	15	20	0	120	54946.5	425.64	54520.8	0.992254	2	3490.52	1	0
	2	1	0	0	84	3.03	1	1	5.1	0	2	0	15	20	0	138	27137.6				3	3395.57	1	0
	1	7	1	1	91	3.5	0	1	4.2	0	2	0	20	20	0						4	3384.57	1	0			1
	2	6	0	0	42	2.3	1	1		0	2	0	20	5	0	133	40759.2				3	3374.66	1	0
	1	12	0	0	42	2.4	0	1	4.2	0	2	0	20	10	0	130	15507.6	2099.5	13408.1	0.864615	3	3310.54	1	0
	1	2	1	1	35	2.6	0	1		0	2	0	20	50	0	120	9311.98				3	3278.09	1	0
	2	3	0	0	35	1.9	0	1	3	0	2	0	20	50	0	127	27291.2				3	3255	1	0
	2	2	0	0	42	2.44	1	1	3.2	0	2	0	10	10	0	137	24226.3				3	3213.43	1	0
	2	3	1	0	42	1.1	2	1		0	2	0	10	10	0	127	14438.1				3	2845.22	0	0	medical treatment	3	2
	1	11	1	0	28	2.4	0	1	4.2	0	2	0	10	10	0	135	14465.5				2	1618.18	1	0			2
	1	13	1	1	63	1.3	0	1		1	1	1	30	20	0	110	3053.46	120.62	2932.84	0.960497	10	10885.5	1	0			1
	3	2	1	0	56	6.4	0	1	3.3	1	1	0	20	100	1	81	209863				17	36096.4	1	0
	1	12	1	0	49	3.5	0	1		1	1	0	45	50	0	120	93219.7	935.57	92284.1	0.989964	11	31026.8	1	0
	1	5	1	1	42	2.3	0	1	3.6	1	1	0	10	10	0	93	12391.9	2183.92	10208	0.823762	9	27623.2	1	0
	1	11	1	0	49	2.2	1	1	5.3	1	1	0	10	5	0	136	101718				6	27034.8	1	0			1
	2	3	1	1	35	1.6	0	1		1	1	0	10	50	0	120	19738.7				7	25436.6	1	0		2	1
	1	7	1	0	56	5	0	1		1	1	0	35	100	0		197088	7057.74	190031	0.96419	3	25386.9	1	0			1
	1	4	1	0	42	3.1	1	1		1	1	0	10	10	0	122	85660.6	25589	60071.6	0.701275	6	24220.4	1	0
	1	8	1	0	49	5.9	1	1	3.8	1	1	0	45	20	0	137	109208	10851.9	98356.2	0.900631	7	24064.9	1	0
	1	5	1	0	56	4.9	1	1		1	1	0	10	10	0	118	168050	4014.28	164035	0.976113	7	23289.4	0	0	observation and drug	3	1
	1	4	1	0	42	3.1	1	1	3.7	1	1	0	25	10	0	146	54840	316.2	54523.8	0.994234	8	22179.1	1	0
	1	5	1	0	49	5	0	1	3	1	1	0	30	50	0	130	13558.1	867.49	12690.7	0.936017	23	6589.53	1	0			1
	1	14	1	1	49	1.07	0	1		1	1	0	15	10	0						6	4588.08	1	0
	2	2	1	0	49	4.3	1	1	4.5	1	1	0	15	50	0	132	142782		142782	1	5	4486.57	1	0
	1	9	0	0	77	1.9	1	1	3.3	1	1	0	40	300	0	132					7	4372.89	0	0	medical treatment	3	2
	1	14	1	0	77	3.5	0	1	4.5	1	1	0	10	10	0	148	3268.99				5	4285.79	0	0	Curettage again
	2	4	0	0	42	1.3	2	1	3.3	1	1	0	20	5	0	123	39061.6	15985	23076.6	0.590774	7	4133.09	0	0	medical treatment	3	1
	1	8	0	1	49	3.1	1	1	3	1	1	0	15	20	0	139	99120.1	14881.8	84238.3	0.849861	6	4122.19	1	0		2	1
	2	4	0	0	63	2.4	0	1	3.7	1	1	0	20	10	0	125	36971.7				6	3933.44	0	0	medical treatment	3	2
	1	8	1	1	42	3	0	1	3.2	1	1	0	10	10	0	135	10612.3				5	3783.96	1	0		2	2
	2	4	1	0	49	5.2	1	1	3	1	1	0	30	20	0	74	71918.8	617.65	71301.2	0.991412	6	3447.86	1	0
	1	7	0	0	42	3.1	1	1	3.7	1	1	0	15	20	0	99	52870.8	6842.64	46028.2	0.870578	10	3386.67	1	0
	2	2	0	0	49	2.5	2	1	3	1	1	0	10	20	0	101	21022.8	291.67	20731.1	0.986126	6	3386.52	1	0			2
	1	12	0	0	49	3	1	1	3.3	1	1	0	10	10	0	143	40271	5027.01	35244	0.87517	3	2865.4	1	0			2
	1	13	1	0	91	1	0	1		1	1	0	15		0			1086.76			9	2378.75	1	0			2
	2	2	0	0	35	1.5	1	1	6.4	1	1	0	15	10	0	141	19662	6540.74	13121.2	0.66734	4	1841.78	1	0			2
